# Supplementary material for: Pilot Test of a Spanish Version of a Previously Validated HPV Survey that Evaluates Dental Students’ Knowledge, Perception and Clinical Practices in Latin America
Source: Research Square preprint supplement (doi:10.21203/rs.3.rs-420050/v1), 2021-04-29
Supplement: Supplementary file 1 [file a97a1eb083ddccf5ad094336.xlsx]

## Sheet: Raw Data - Colombia (1)
1			21:00:00	2016-09-18	Oral Cancer only includes the oral cavity, Oropharyngeal cancer includes the oral cavity, pharynx and larynx	1	0	1	0	1	1	1	1	0	1	1	1	1	1	0	1	1	0	1	0	0	1	1	1	0	1	1	1	1	0	1	1	0	1	0	0	1	0	0	1	1	0	1	1
2			20:47:00	2016-09-20	Oral cancer is in the oral cavity and oro- pharyngeal is in the pharynx.	99	1	1	0	1	99	99	99	99	1	1	1	1	1	99	1	99	99	99	99	1	99	1	1	0	1	99	99	1	0	0	0	0	1	99	99	99	99	99	1	99	99	1	99
3			21:08:00	2016-09-20	Oral cancer is in the oral cavity and oro-pharyngeal cancer is located midway between the pharynx and the mouth.	1	0	99	99	1	99	1	1	99	1	99	1	99	99	99	99	99	0	0	0	99	99	1	99	99	99	99	99	1	0	99	0	0	99	99	0	99	99	0	0	99	99	99	99
4			21:26:00	2016-09-20		1	99	1	99	1	1	99	99	1	1	99	99	1	1	99	99	99	1	99	1	1	1	0	1	1	99	99	99	1	0	1	1	1	0	1	0	1	99	0	0	99	99	99	99
5			21:09:00	2016-09-25		1	0	1	99	0	99	1	0	0	0	0	1	99	99	1	0	0	1	1	1	1	99	1	99	1	1	1	0	99	0	0	1	0	0	0	0	1	99	0	0	99	99	99	1
6			21:35:00	2016-09-25	Oral cancer is produced in the oral cavity and oropharyngeal in the pharynx, each is caused by different reasons.	0	0	1	0	1	1	1	0	0	1	1	99	0	99	1	99	1	1	1	0	0	1	1	1	0	1	99	99	99	1	99	1	1	99	1	0	99	99	1	0	99	1	1	1
7			21:58:00	2016-09-25	The second one compromises different organs than the mouth, like the pharynx.	1	0	1	99	1	0	1	1	1	1	99	1	0	99	99	99	99	1	1	0	99	1	1	1	1	1	99	99	99	0		1	0	1	0	0	99	1	1	0	99	99	1	1
8			21:25:00	2016-09-26	Oral cancer manifests in the mouth and oropharyngeal includes the posterior part of the oral cavity and part of the digestive and oropharyngeal airway.	1	0	1	1	1	1	99	0	0	1	1	1	99	99	99	99	1	1	1	0	99	99	1	1	0	1	99	99	0	0	0	1	99	99	1	0		1	1	1	99	99	0	1
9			20:25:00	2016-09-27	I don't know	1	1	1	0	1	1	99	1	0	1	1	1	99	99	1	1	1	1	1	99	99	1	1	1	99	1	99	99	1	0	99	99	0	1	99	0	1	99	99	0	99	99	1	99
10			21:12:00	2016-09-27	Oral cancer is only in the oral cavity and the oropharyngeal is from the oral cavity to the pharynx.	1	0	1	99	1	1	1	0	0	1	1	1	99	1	99	99	99	1	1	0		1	1	1	1	99	99	99	99	0	1	1	99	99	99	99	1	0	0	0	99	1	1	99
11			21:40:00	2016-09-27	Oral cancer is more external and oropharyngeal cancer in addition to the oral cavity it goes a little more internal to the pharynx.	1	0	0	0	99	99	1	99	99	1	0	1	1	99		0	99	1	1	99	1	0	0	1	0	99	99	99	0	0	1	0	0	99	99	99	1	99	0	99	99	1	1	99
12			21:59:00	2016-09-27	Oral cancer around the mouth and the oral cavity and oropharyngeal cancer affects the larynx and the pharynx.	1	1	1	0	1	1	1	99	99	1	1	99	99	99	99	1	0	1	1	99	1	99	1	1	1	1	99	99	1	0	0	1	99	99	99	0	99	99	0	0	99	0	99	1
13			22:25:00	2016-09-27	Oral cancer only affects the mouth and oropharyngeal is developed in the pharynx and I guess affects the respiratory airways.	1	99	99	99	99	99	99	99	99	99	99	99	99	99	99	99	99	99	99	99	99	99	0	99	99	99	99	99	99	99	99	99	99	99	99	99	99	99	99	99	99	99	99	99
14			22:25:00	2016-09-27	Oral cancer is produced in the oral cavity and oropharyngeal cancer is in the upper part of the pharynx.	1	1	1	99	99	99	1	1	0	1	99	1	99	99	99	99	99	1	1	1	1	1	1	1	1	99	99	99	1	0	1	1	99	99	99	99	99	0	99	99	99	99	1	99
15			22:25:00	2016-09-27	Oropharyngeal cancer is located in a more specific site.	1	0	99	99	1	99	99	99	99	99	99	1	99	99	99	99	99	1	1	99	1	99	1	99	99	1	99	99	1	99	99	0	0	99	99	99	99	99	99	1	99	99	99	99
16			22:25:00	2016-09-27	Oral cancer is located in the mouth, meanwhile oropharyngeal affects parts located in the pharynx, esophagus, etc.	1	1	1	0	0	1	1	0	0	0	99	0	1	99	99	99	99	1	1	1	0	1	1	1	0	99	99	99	99	0	0	99	99	99	99	99	1	0	0	0	0	1	1	99
17			22:25:00	2016-09-27	They differ in that oral is in the mouth, and oropharyngeal is more internal.	1	1		0	1	1	0	0	0	1	0	1		99	1	0		1	1	0	0	99	1	1	0	1	99	0	1	0	0	0	0	0	0	0	1	0	0	1	0	99	1	99
18			22:25:00	2016-09-27	The location.	1	99	1	0	1	1	99	0	0	99	1	1	99	1	99	99	99	1	1	99	99	99	1	99	99	99	99	99	99	0	0	99	99	99	99	0	99	0	0	0	0	99	0	99
19			22:25:00	2016-09-27	I don't know.	1	1	1	99	1	99	99	99	99	1	99	99	99	99	99	99	99	1	1	99	99	0	0	1	99	99	99	99	1	0	1	0	99	99	99	0	99	99	0	0	99	1	1	99
20			22:25:00	2016-09-27	Oral cancer is developed in the oral cavity, in some of it's components, as to soft tissues; meanwhile oropharyngeal cancer has it's origin at pharyngeal level.	1	1	1	99	1	1	99	99	0	99	1	1	99	99	99	1	1	1	1	1	99	1	1	1	1	1	99	99	99	0	0	1	1	1	0	99	99	99	1	0	99	99	1	1
21			22:25:00	2016-09-27	Oral cancer is developed in the whole stomatognathic system, specifically and in the majority of the occasions it is determined easily in the oral cavity, oropharyngeal cancer is developed in a more specific area of the pharynx, mouth, etc. For me they are the same and there is no difference.	1	1	1	0	1	1	1	1	99	1	99	1	0		0	0	1	0	99	0	1	1	0	1	1	1	1	0	0	0	0	1	1	0	1	1	0	0	0	0	0	1	1	1
22			23:10:00	2016-09-29	That oral cancer affects only the buccal part and that oropharyngeal also affects part of the digestive tract.	1	0	0	0	1	1	1	99	1	99	99	99	99	1	1	99	99	0	1	0	1	1	1	1	0	99	99	0	1	0	1	1	99	0	99	0	1	0	0	1	0	1	1	1
23			19:55:00	2016-09-30		1	0		1	1	1	99	99	1	1	99	1	99	1	99	99	99	1	1	0	99	99	1	1	99	99	99	99	99	0	1	1	99	99	99	99	1	0	0	0	0	99	1	99
24			20:07:00	2016-09-30		1		1	0	1	1	1	99	99	1	1		99	99	99	1	1	1	1	1	99	1	1	99	99	1		1	99	0	1	1	1		99	1	1	99	0	0	99	99	1	1
25			15:06:00	2016-10-02
26			15:07:00	2016-10-02	I don't know	1	1	1	1	99	99	99	99	99	1		1	99	0		1	0	1	99	99	99	99	0	1	99	99	99	99	99	99	99	99	99	99	99	99	99	99	99	1	1	99	99	99
27			15:22:00	2016-10-02		1	0	1	99	99	1	1	1	0	99	99	1	99	99	1	99	99	99	1	0	99	99	1	1	99	99	99	99	1	0	0	0	0	0	1	0	1	99	0	99	1	1	1	99
28			16:12:00	2016-10-02	Oral cancer can be caused by external factors and oropharyngeal cancer is associated mostly to immunity.	1	1	1	99	1	0	1	0	0	1	1	1	99	99	0	1	0	1	1	0	0	1	1	1	0	1	99	1	1	0	0	0	0	0	1	0	99	1	0	0	99	99	1	0
29			16:35:00	2016-10-02	Oral cancer -> mouth. Oropharyngeal cancer -> middle of pharyngeal area.	1	0	1	0	1	1	99	1	0	1	0	1	99	99	99	99	99	1	1	99	99	99	1	1	99	99	99		99	0	1	1	0	99	99	99	1	0	0	0	99	99	1	99
30			17:01:00	2016-10-02	Oral cancer is in the mouth. Pharyngeal cancer is in the throat.	99	1	0	1	99	0	99	1	1	1	1	99	0	99	99	99	99	1	1	1	0		0	99	1	1	0	1	99	99	0	1	0	1	0	99	99	1	99	0	0	99	0	99
31			20:00:00	2016-10-02	Oral cancer is developed in the oral cavity and oropharyngeal cancer is the pharynx area.	1	0	1	99	1	1	1	1	1	1	1	1	99	99	1	99	99	1	1	99	1	1	0	1	99	1	1	99	1	0	0	0	0	99	1	0	99	99	1	0	99	1	1	99
32			20:16:00	2016-10-02	That oro-pharyngeal cancer includes the pharynx.	1	0	1	99	99	1	1	99	99	99	99	99	99	99	99	99	99	1	1	99	99	99	1	1	99	99	99	99	99	0	1	1	99	99	99	99	99	99	0	1	99	99	99	99
33			20:36:00	2016-10-02		1	1	1	99	1	99	99	99	99	99	99	0	1	99	1	99	99	1	1	0	1	1	0	99	99	99	99	99	99	0	0	99	99	99	99	99	99	99	0	0	99	1	99	99
34			20:41:00	2016-10-02	Oral cancer is produced in the oral cavity and the other one in the pharynx.	0	0	1	0	1	1	99	99	99	1	1	1	99	1	99	99	99	1	1	99	1	1	0	1	0	1	99	99	99	0	0	1	99	99	99	99	99	99	0	0	99	1	1	99
35			21:00:00	2016-10-02	I don't know.	1	1	1	0	1	1	99	1	99	1	99	99	99	99	99	99	99	1	1	99	99	1	0		0	99	99	99	0	0	0	1	99	99	1	99	99	99	99	1	99	1	1	99
36			21:27:00	2016-10-02	I do not know the differences.	0	1	1	0	1	1	1	0	0	1	1	1		99	99	99		99	1	1	99	99	1	1	0	1	1	99		0	0	1	1	0	1	0	0	0	0	0	99	1	99	1
[truncated: 272 more columns]
